# Supplementary material for: Technical Note: Probabilistically constraining proxy age–depth models within a Bayesian hierarchical reconstruction model
Source: Copernicus journal article supplement (doi:10.5194/cp-11-533-2015), 2015-03-24
Supplement: Supplementary file 1 [file cp-11-533-2015-supplement.zip]

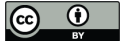

## *Supplement of*

# **Technical Note: Probabilistically constraining proxy age–depth models within a Bayesian hierarchical reconstruction model**

**J. P. Werner and M. P. Tingley**

*Correspondence to:* J. P. Werner (johannes.werner@geo.uib.no)

- cp-11-533-2015-supplement-cover-letter.pdf
- BARCAST+AMS
  - README
  - example\_data
    - \* BARCASTINPUTvNewMeth1\_ADMs.R
    - \* PriorPars.RScript
  - fortran\_branch
    - \* BARCASTMainCode\_Rmpi.R
    - \* BARCAST\_PreSampler.R
    - \* BARCAST\_PreSwitchSampler.R
    - \* BARCAST\_Sampler\_MC3.R
    - \* BARCAST\_SetInitialValues.R
    - \* CovariancePatterns.R
    - \* InitialparvalsvNewModel.R
    - \* Makefile
    - \* PriorParsvNewModel.R
    - \* Proxy\_Time\_Updater.R
    - \* Proxy\_Updater.f95
    - \* T\_Updater.f95
  - gpl.txt
  - helper\_programs
    - \* AreaWeightedData.R
    - \* Common.R
    - \* ConstructTestDatavNM.R
    - \* CovPattern\_COA.R
    - \* Error\_Measures.R

- \* Eval\_PPE.R
- \* Eval\_TimeUncertain\_Recon.R
- \* Field\_Means.R
- \* Gather\_Temp\_Data.R
- \* HadCRUT\_mean\_cov.R
- \* Normalise\_Data.R
- \* ReadCRNtoList.R
- \* Read\_HN\_WSL\_files.R
- \* ScoringRules.R
- \* create\_t\_test.R
- \* readCRN.R
- local\_libs
  - \* Makefile
  - \* blassm.f
  - \* formats.f
  - \* libskitlocal.a
  - \* matvec.f
  - \* random.f90
  - \* tupdater\_data.mod
  - \* ziggurat.f90
